# Supplementary material
Source: PubMed Central journal article supplement (PMC7271534)
Supplement: 12915_2020_785_MOESM7_ESM.pdf [file 12915_2020_785_MOESM7_ESM.pdf]

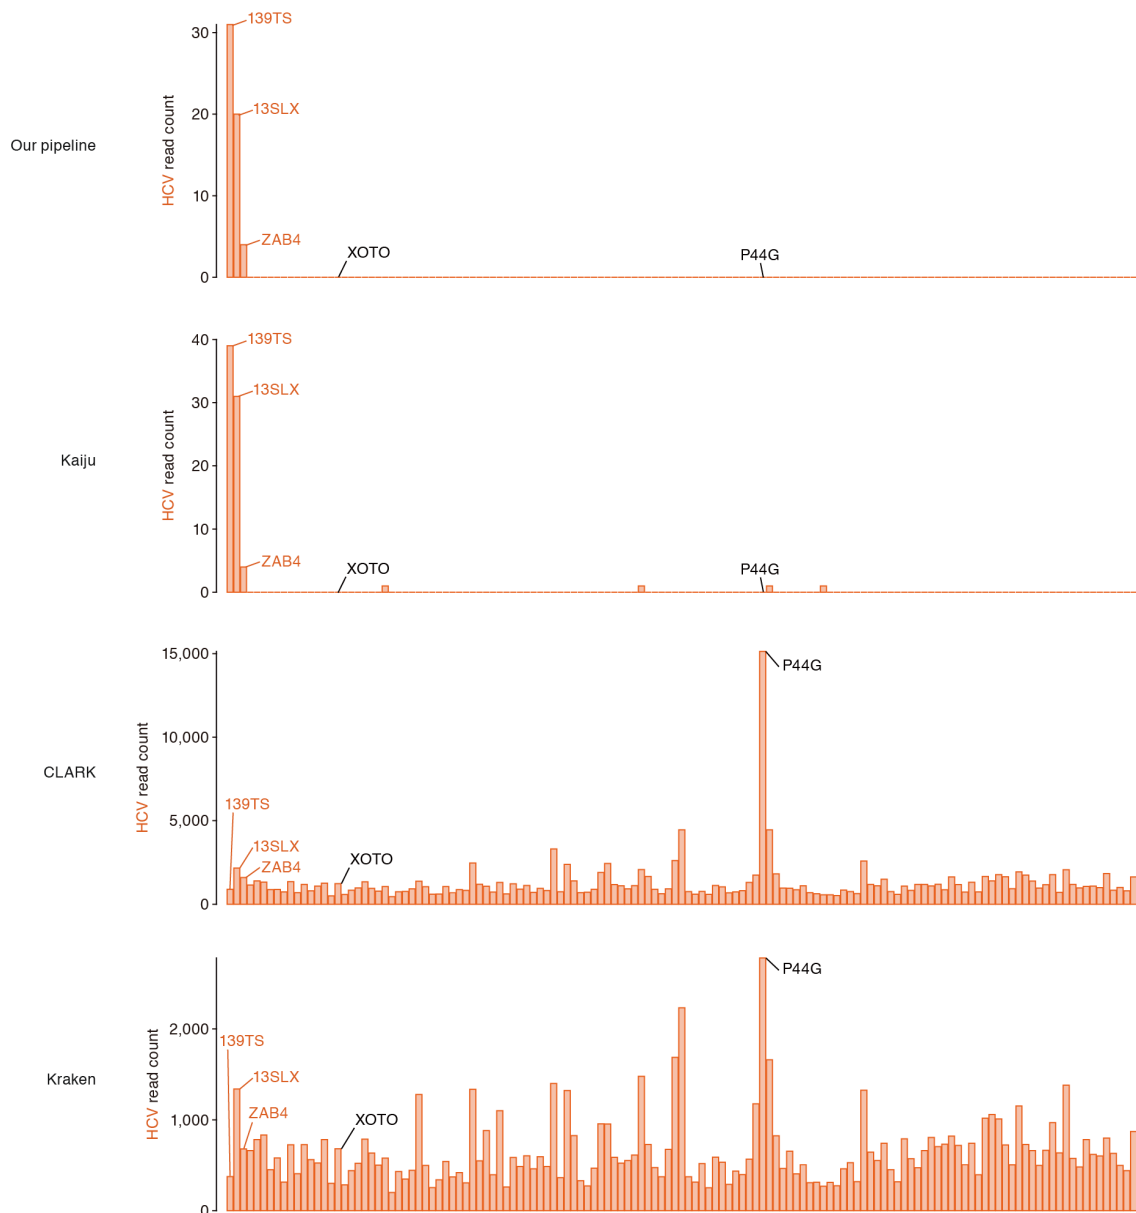

**Additional file 7: Figure S2. Comparison of our analytical pipeline with the other pipelines.**

The amounts of HCV reads in each liver sample (n=136) detected by four pipelines: our pipeline, Kaiju, CLARK, and Kraken, are shown. Each bar column in each panel indicates the same sample. The liver samples shown in Fig. 3B are indicated in the figure.
