# Supplementary material
Source: PubMed Central journal article supplement (PMC7271534)
Supplement: 12915_2020_785_MOESM8_ESM.pdf [file 12915_2020_785_MOESM8_ESM.pdf]

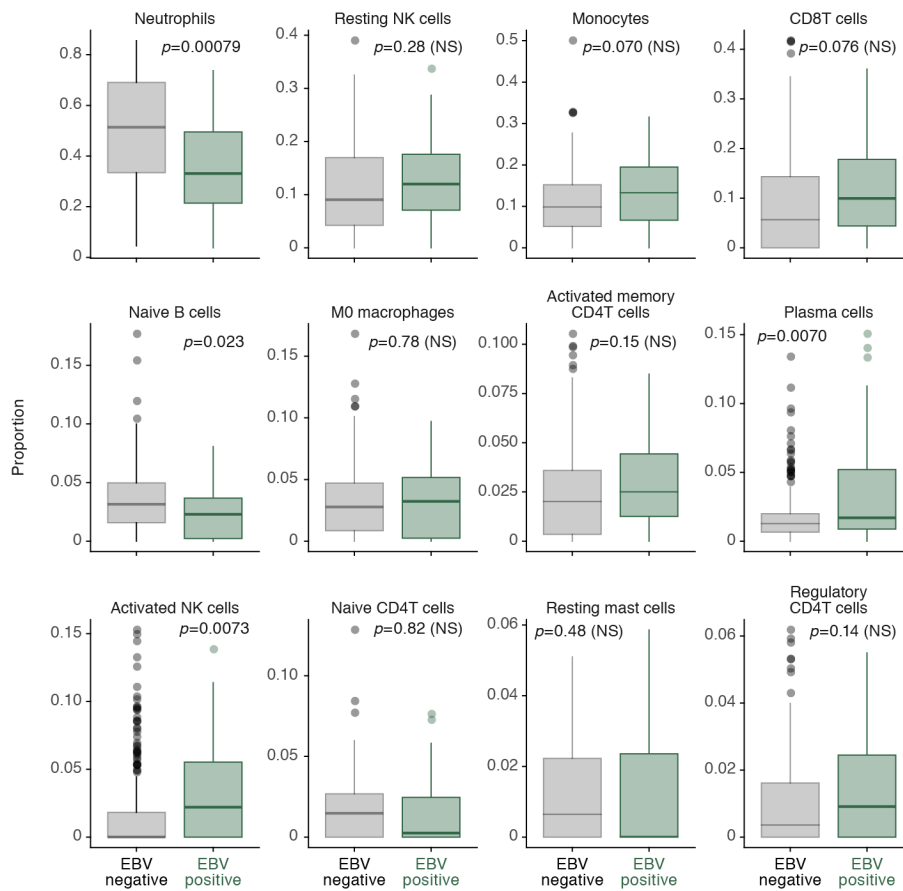

**Additional file 8: Figure S3. Deconvolution analysis in the blood of EBV-positive and -negative subjects.**

Distributions of the proportions of top 12 cell types with high proportion in blood are summarized. Each dot indicates the result from respective samples, and the statistical summary of distribution is shown as a box plot. Statistical significance was determined by Welch's *t* test. Note that the panel of "plasma cells" is identical to that in **Fig. 4C**.
