# Supplementary material
Source: PubMed Central journal article supplement (PMC7271534)
Supplement: 12915_2020_785_MOESM10_ESM.pdf [file 12915_2020_785_MOESM10_ESM.pdf]

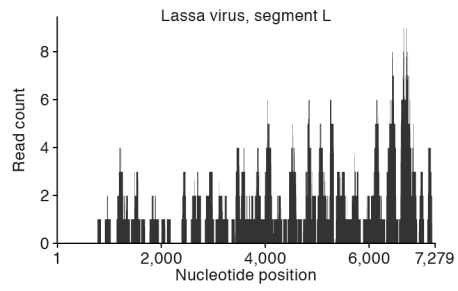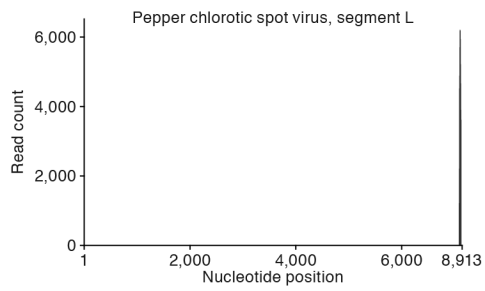

**Additional file 10: Figure S5. Read mapping to Lassa virus segment L and Pepper chlorotic spot virus segment L.**

Coverages of the reads of Lassa virus and Pepper chlorotic spot virus from all samples are shown. Note that the reads of these viruses are only mapped to a viral segment, segment L.
